# Supplementary material
Source: PubMed Central journal article supplement (PMC1609228)
Supplement: rstb20051714s02.pdf [file rstb20051714s02.pdf]

# ELECTRONIC APPENDIX

This is the Electronic Appendix to the article

DNA Barcoding for Effective Biodiversity Assessment of a Hyperdiverse Arthropod  
Group: the Ants of Madagascar

by

M. Alex Smith, Brian L. Fisher and Paul D. N. Hebert

*Phil. Trans. R. Soc. B* ([doi:10.1098/rstb.2005.1714](https://doi.org/10.1098/rstb.2005.1714))

Electronic appendices are refereed with the text; however, no attempt is made  
to impose a uniform editorial style on the electronic appendices.

Figure 5. Neighbour-joining analysis of K2P distance for ant specimens collected in the north of Madagascar in the winter of 2004. Only those sequences greater than 350 bp are shown (n = 263). Collection sites are colour coded. Ambato = blue, Marojejy = black, Antsahabe = green, and Binara = red.

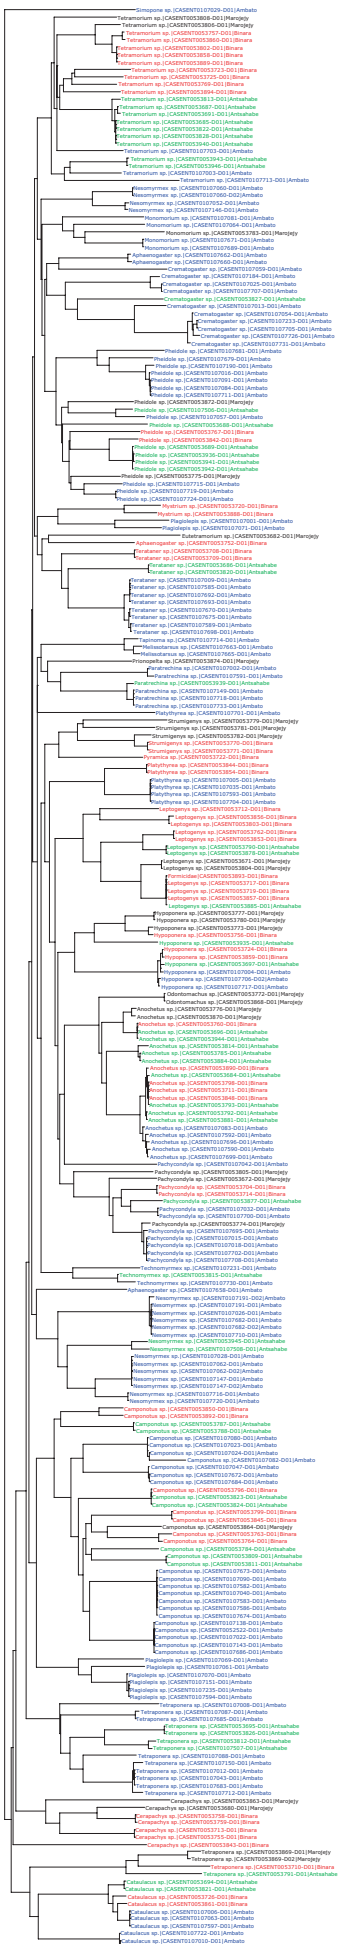

Appendix A: Specimen accession numbers for California Academy of Sciences, BOLD and Genbank with collection details and the assignment of individuals to species using molecular (3%) and morphological techniques. Internal = LF\_AMR1D\_MLR\_LR.

| <b>Accession Number</b> | <b>BOLD ID</b> | <b>Morphospecies</b> | <b>3% MOTU</b>   | <b>2% MOTU</b>   | <b>Sequence Length</b> | <b>Primer Pair</b> | <b>Collection Latitude</b> | <b>Collection Longitude</b> |
|-------------------------|----------------|----------------------|------------------|------------------|------------------------|--------------------|----------------------------|-----------------------------|
| CASENT0053785-D01       | JDWAM306-05    | Anochetus m1         | Anochetus MOTU-1 | Anochetus MOTU-3 | 657                    | LF_LR              | -13.2117                   | 49.5567                     |
| CASENT0053814-D01       | JDWAM328-05    | Anochetus m1         | Anochetus MOTU-1 | Anochetus MOTU-3 | 656                    | LF_LR              | -13.2117                   | 49.5567                     |
| CASENT0053884-D01       | JDWAM377-05    | Anochetus m1         | Anochetus MOTU-1 | Anochetus MOTU-3 | 657                    | LF_LR              | -13.2117                   | 49.5567                     |
| CASENT0053696-D01       | JDWAM258-05    | Anochetus m2         | Anochetus MOTU-2 | Anochetus MOTU-2 | 649                    | LF_LR              | -13.2117                   | 49.5567                     |
| CASENT0053760-D01       | JDWAM284-05    | Anochetus m2         | Anochetus MOTU-2 | Anochetus MOTU-2 | 657                    | LF_LR              | -13.2633                   | 49.6033                     |
| CASENT0053776-D01       | JDWAM298-05    | Anochetus m2         | Anochetus MOTU-2 | Anochetus MOTU-1 | 657                    | LF_LR              | -14.4367                   | 49.775                      |
| CASENT0053870-D01       | JDWAM370-05    | Anochetus m2         | Anochetus MOTU-2 | Anochetus MOTU-1 | 657                    | LF_LR              | -14.4367                   | 49.775                      |
| CASENT0053944-D01       | JDWAM391-05    | Anochetus m2         | Anochetus MOTU-2 | Anochetus MOTU-2 | 657                    | LF_LR              | -13.2117                   | 49.5567                     |
| CASENT0053684-D01       | JDWAM249-05    | Anochetus m3         | Anochetus MOTU-3 | Anochetus MOTU-4 | 614                    | LF_LR              | -13.2117                   | 49.5567                     |
| CASENT0053711-D01       | JDWAM266-05    | Anochetus m3         | Anochetus MOTU-3 | Anochetus MOTU-4 | 657                    | LF_LR              | -13.2633                   | 49.6033                     |
| CASENT0053792-D01       | JDWAM312-05    | Anochetus m3         | Anochetus MOTU-3 | Anochetus MOTU-4 | 657                    | LF_LR              | -13.2117                   | 49.5567                     |
| CASENT0053793-D01       | JDWAM313-05    | Anochetus m3         | Anochetus MOTU-3 | Anochetus MOTU-4 | 657                    | LF_LR              | -13.2117                   | 49.5567                     |
| CASENT0053798-D01       | JDWAM315-05    | Anochetus m3         | Anochetus MOTU-3 | Anochetus MOTU-4 | 655                    | LF_LR              | -13.2633                   | 49.6033                     |
| CASENT0053848-D01       | JDWAM350-05    | Anochetus m3         | Anochetus MOTU-3 | Anochetus MOTU-4 | 657                    | LF_LR              | -13.2633                   | 49.6033                     |
| CASENT0053881-D01       | JDWAM376-05    | Anochetus m3         | Anochetus MOTU-3 | Anochetus MOTU-4 | 657                    | LF_LR              | -13.2117                   | 49.5567                     |
| CASENT0053890-D01       | JDWAM381-05    | Anochetus m3         | Anochetus MOTU-3 | Anochetus MOTU-4 | 657                    | LF_LR              | -13.2633                   | 49.6033                     |
| CASENT0107083-D01       | JDWAM443-05    | Anochetus m3         | Anochetus MOTU-3 | Anochetus MOTU-5 | 657                    | LF_LR              | -13.4644                   | 48.5517                     |
| CASENT0107590-D01       | JDWAM537-05    | Anochetus m3         | Anochetus MOTU-3 | Anochetus MOTU-5 | 633                    | Internal           | -13.4644                   | 48.5517                     |
| CASENT0107592-D01       | JDWAM539-05    | Anochetus m3         | Anochetus MOTU-3 | Anochetus MOTU-5 | 606                    | Internal           | -13.4644                   | 48.5517                     |
| CASENT0107696-D01       | JDWAM656-05    | Anochetus m3         | Anochetus MOTU-3 | Anochetus MOTU-5 | 625                    | Internal           | -13.4644                   | 48.5517                     |
| CASENT0107699-D01       | JDWAM659-05    | Anochetus m3         | Anochetus MOTU-3 | Anochetus MOTU-5 | 624                    | Internal           | -13.4644                   | 48.5517                     |

|                                                |                      |                      |     |          |          |         |
|------------------------------------------------|----------------------|----------------------|-----|----------|----------|---------|
| CASENT0053752-D01 JDWAM278-05 Aphaenogaster m1 | Aphaenogaster MOTU-3 | Aphaenogaster MOTU-3 | 644 | LF_LR    | -13.2633 | 49.6033 |
| CASENT0107660-D01 JDWAM632-05 Aphaenogaster m1 | Aphaenogaster MOTU-1 | Aphaenogaster MOTU-1 | 543 | LF_LR    | -13.4644 | 48.5517 |
| CASENT0107662-D01 JDWAM767-05 Aphaenogaster m1 | Aphaenogaster MOTU-1 | Aphaenogaster MOTU-1 | 624 | Internal | -13.4644 | 48.5517 |
| CASENT0107658-D01 JDWAM630-05 Aphaenogaster m2 | Aphaenogaster MOTU-2 | Aphaenogaster MOTU-2 | 611 | Internal | -13.4644 | 48.5517 |
| CASENT0107040-D01 JDWAM419-05 Camponotus m1    | Camponotus MOTU-11   | Camponotus MOTU-11   | 656 | LF_LR    | -13.4644 | 48.5517 |
| CASENT0107090-D01 JDWAM447-05 Camponotus m1    | Camponotus MOTU-11   | Camponotus MOTU-11   | 656 | LF_LR    | -13.4644 | 48.5517 |
| CASENT0107582-D01 JDWAM532-05 Camponotus m1    | Camponotus MOTU-11   | Camponotus MOTU-11   | 656 | LF_LR    | -13.4644 | 48.5517 |
| CASENT0107583-D01 JDWAM533-05 Camponotus m1    | Camponotus MOTU-11   | Camponotus MOTU-11   | 593 | LF_LR    | -13.4644 | 48.5517 |
| CASENT0107586-D01 JDWAM535-05 Camponotus m1    | Camponotus MOTU-11   | Camponotus MOTU-11   | 656 | LF_LR    | -13.4644 | 48.5517 |
| CASENT0107673-D01 JDWAM641-05 Camponotus m1    | Camponotus MOTU-11   | Camponotus MOTU-11   | 657 | LF_LR    | -13.4644 | 48.5517 |
| CASENT0107674-D01 JDWAM642-05 Camponotus m1    | Camponotus MOTU-11   | Camponotus MOTU-11   | 656 | LF_LR    | -13.4644 | 48.5517 |
| CASENT0053892-D01 JDWAM771-05 Camponotus m10   | Camponotus MOTU-1    | Camponotus MOTU-1    | 657 | LF_LR    | -13.2633 | 49.6033 |
| CASENT0107023-D01 JDWAM410-05 Camponotus m2    | Camponotus MOTU-3    | Camponotus MOTU-3    | 657 | LF_LR    | -13.4644 | 48.5517 |
| CASENT0107024-D01 JDWAM411-05 Camponotus m2    | Camponotus MOTU-3    | Camponotus MOTU-3    | 657 | LF_LR    | -13.4644 | 48.5517 |
| CASENT0107080-D01 JDWAM440-05 Camponotus m2    | Camponotus MOTU-3    | Camponotus MOTU-3    | 657 | LF_LR    | -13.4644 | 48.5517 |
| CASENT0107082-D01 JDWAM442-05 Camponotus m2    | Camponotus MOTU-3    | Camponotus MOTU-3    | 651 | LF_LR    | -13.4644 | 48.5517 |
| CASENT0053784-D01 JDWAM305-05 Camponotus m3    | Camponotus MOTU-9    | Camponotus MOTU-9    | 657 | LF_LR    | -13.2117 | 49.5567 |
| CASENT0053799-D01 JDWAM316-05 Camponotus m3    | Camponotus MOTU-8    | Camponotus MOTU-8    | 657 | LF_LR    | -13.2633 | 49.6033 |
| CASENT0053809-D01 JDWAM324-05 Camponotus m3    | Camponotus MOTU-10   | Camponotus MOTU-10   | 657 | LF_LR    | -13.2117 | 49.5567 |
| CASENT0053811-D01 JDWAM325-05 Camponotus m3    | Camponotus MOTU-10   | Camponotus MOTU-10   | 657 | LF_LR    | -13.2117 | 49.5567 |
| CASENT0053845-D01 JDWAM349-05 Camponotus m3    | Camponotus MOTU-8    | Camponotus MOTU-8    | 657 | LF_LR    | -13.2633 | 49.6033 |
| CASENT0052522-D01 JDWAM227-05 Camponotus m4    | Camponotus MOTU-12   | Camponotus MOTU-12   | 657 | LF_LR    | -13.4644 | 48.5517 |
| CASENT0107022-D01 JDWAM409-05 Camponotus m4    | Camponotus MOTU-12   | Camponotus MOTU-12   | 657 | LF_LR    | -13.4644 | 48.5517 |
| CASENT0107138-D01 JDWAM460-05 Camponotus m4    | Camponotus MOTU-12   | Camponotus MOTU-12   | 657 | LF_LR    | -13.4644 | 48.5517 |
| CASENT0107143-D01 JDWAM461-05 Camponotus m4    | Camponotus MOTU-12   | Camponotus MOTU-12   | 657 | LF_LR    | -13.4644 | 48.5517 |
| CASENT0107686-D01 JDWAM651-05 Camponotus m4    | Camponotus MOTU-12   | Camponotus MOTU-12   | 657 | LF_LR    | -13.4644 | 48.5517 |
| CASENT0107047-D01 JDWAM424-05 Camponotus m6    | Camponotus MOTU-4    | Camponotus MOTU-4    | 657 | LF_LR    | -13.4644 | 48.5517 |
| CASENT0107672-D01 JDWAM640-05 Camponotus m6    | Camponotus MOTU-4    | Camponotus MOTU-4    | 657 | LF_LR    | -13.4644 | 48.5517 |

|                                             |                   |                   |     |          |          |         |
|---------------------------------------------|-------------------|-------------------|-----|----------|----------|---------|
| CASENT0107684-D01 JDWAM649-05 Camponotus m6 | Camponotus MOTU-4 | Camponotus MOTU-4 | 657 | LF_LR    | -13.4644 | 48.5517 |
| CASENT0053763-D01 JDWAM286-05 Camponotus m7 | Camponotus MOTU-7 | Camponotus MOTU-7 | 654 | LF_LR    | -13.2633 | 49.6033 |
| CASENT0053764-D01 JDWAM287-05 Camponotus m7 | Camponotus MOTU-7 | Camponotus MOTU-7 | 657 | LF_LR    | -13.2633 | 49.6033 |
| CASENT0053864-D01 JDWAM363-05 Camponotus m7 | Camponotus MOTU-6 | Camponotus MOTU-6 | 657 | LF_LR    | -14.4367 | 49.775  |
| CASENT0053796-D01 JDWAM314-05 Camponotus m8 | Camponotus MOTU-5 | Camponotus MOTU-5 | 657 | LF_LR    | -13.2633 | 49.6033 |
| CASENT0053823-D01 JDWAM335-05 Camponotus m8 | Camponotus MOTU-5 | Camponotus MOTU-5 | 657 | LF_LR    | -13.2117 | 49.5567 |
| CASENT0053824-D01 JDWAM336-05 Camponotus m8 | Camponotus MOTU-5 | Camponotus MOTU-5 | 657 | LF_LR    | -13.2117 | 49.5567 |
| CASENT0053787-D01 JDWAM308-05 Camponotus m9 | Camponotus MOTU-2 | Camponotus MOTU-2 | 621 | Internal | -13.2117 | 49.5567 |
| CASENT0053788-D01 JDWAM309-05 Camponotus m9 | Camponotus MOTU-2 | Camponotus MOTU-1 | 621 | Internal | -13.2117 | 49.5567 |
| CASENT0053850-D01 JDWAM352-05 Camponotus m9 | Camponotus MOTU-1 | Camponotus MOTU-2 | 612 | Internal | -14.4367 | 49.775  |
| CASENT0053694-D01 JDWAM256-05 Cataulacus m1 | Cataulacus MOTU-1 | Cataulacus MOTU-1 | 657 | Internal | -13.2117 | 49.5567 |
| CASENT0053726-D01 JDWAM277-05 Cataulacus m1 | Cataulacus MOTU-1 | Cataulacus MOTU-2 | 656 | LF_LR    | -13.2633 | 49.6033 |
| CASENT0053821-D01 JDWAM333-05 Cataulacus m1 | Cataulacus MOTU-1 | Cataulacus MOTU-1 | 655 | LF_LR    | -13.2117 | 49.5567 |
| CASENT0053861-D01 JDWAM361-05 Cataulacus m1 | Cataulacus MOTU-1 | Cataulacus MOTU-3 | 625 | Internal | -13.2633 | 49.6033 |
| CASENT0107006-D01 JDWAM400-05 Cataulacus m1 | Cataulacus MOTU-1 | Cataulacus MOTU-4 | 657 | LF_LR    | -13.4644 | 48.5517 |
| CASENT0107063-D01 JDWAM435-05 Cataulacus m1 | Cataulacus MOTU-1 | Cataulacus MOTU-4 | 657 | LF_LR    | -13.4644 | 48.5517 |
| CASENT0107597-D01 JDWAM542-05 Cataulacus m1 | Cataulacus MOTU-1 | Cataulacus MOTU-4 | 657 | LF_LR    | -13.4644 | 48.5517 |
| CASENT0107010-D01 JDWAM403-05 Cataulacus m2 | Cataulacus MOTU-5 | Cataulacus MOTU-5 | 419 | MLF_LR   | -13.4644 | 48.5517 |
| CASENT0107723-D01 JDWAM681-05 Cataulacus m2 | Cataulacus MOTU-5 | Cataulacus MOTU-5 | 357 | MLF_LR   | -13.4644 | 48.5517 |
| CASENT0107724-D01 JDWAM682-05 Cataulacus m2 | Cataulacus MOTU-5 | Cataulacus MOTU-5 | 657 | LF_LR    | -13.4644 | 48.5517 |
| CASENT0053680-D01 JDWAM247-05 Cerapachys m1 | Cerapachys MOTU-4 | Cerapachys MOTU-4 | 419 | MLF_LR   | -14.4367 | 49.775  |
| CASENT0053758-D01 JDWAM282-05 Cerapachys m1 | Cerapachys MOTU-5 | Cerapachys MOTU-5 | 616 | Internal | -13.2633 | 49.6033 |
| CASENT0053759-D01 JDWAM283-05 Cerapachys m1 | Cerapachys MOTU-5 | Cerapachys MOTU-5 | 419 | MLF_LR   | -13.2633 | 49.6033 |
| CASENT0053807-D01 JDWAM322-05 Cerapachys m1 | Cerapachys MOTU-4 | Cerapachys MOTU-4 | 329 | MLF_LR   | -14.4367 | 49.775  |
| CASENT0053843-D01 JDWAM347-05 Cerapachys m2 | Cerapachys MOTU-1 | Cerapachys MOTU-1 | 657 | LF_LR    | -13.2633 | 49.6033 |
| CASENT0053713-D01 JDWAM268-05 Cerapachys m3 | Cerapachys MOTU-3 | Cerapachys MOTU-3 | 657 | LF_LR    | -13.2633 | 49.6033 |
| CASENT0053755-D01 JDWAM279-05 Cerapachys m3 | Cerapachys MOTU-3 | Cerapachys MOTU-3 | 655 | LF_LR    | -13.2633 | 49.6033 |
| CASENT0053863-D01 JDWAM362-05 Cerapachys m4 | Cerapachys MOTU-2 | Cerapachys MOTU-2 | 626 | LF_LR    | -14.4367 | 49.775  |

|                                                |               |        |               |        |     |          |          |         |
|------------------------------------------------|---------------|--------|---------------|--------|-----|----------|----------|---------|
| CASENT0107013-D01 JDWAM405-05 Crematogaster m1 | Crematogaster | MOTU-4 | Crematogaster | MOTU-4 | 657 | LF_LR    | -13.4644 | 48.5517 |
| CASENT0107025-D01 JDWAM412-05 Crematogaster m1 | Crematogaster | MOTU-2 | Crematogaster | MOTU-2 | 657 | LF_LR    | -13.4644 | 48.5517 |
| CASENT0107041-D01 JDWAM420-05 Crematogaster m1 | Crematogaster | MOTU-5 | Crematogaster | MOTU-5 | 335 | MLF_LR   | -13.4644 | 48.5517 |
| CASENT0107054-D01 JDWAM427-05 Crematogaster m1 | Crematogaster | MOTU-5 | Crematogaster | MOTU-5 | 412 | MLF_LR   | -13.4644 | 48.5517 |
| CASENT0107184-D01 JDWAM468-05 Crematogaster m1 | Crematogaster | MOTU-2 | Crematogaster | MOTU-2 | 656 | LF_LR    | -13.4644 | 48.5517 |
| CASENT0107233-D01 JDWAM473-05 Crematogaster m1 | Crematogaster | MOTU-5 | Crematogaster | MOTU-5 | 376 | MLF_LR   | -13.4644 | 48.5517 |
| CASENT0107705-D01 JDWAM665-05 Crematogaster m1 | Crematogaster | MOTU-5 | Crematogaster | MOTU-5 | 383 | MLF_LR   | -13.4644 | 48.5517 |
| CASENT0107707-D01 JDWAM667-05 Crematogaster m1 | Crematogaster | MOTU-2 | Crematogaster | MOTU-2 | 657 | LF_LR    | -13.4644 | 48.5517 |
| CASENT0107731-D01 JDWAM686-05 Crematogaster m1 | Crematogaster | MOTU-5 | Crematogaster | MOTU-5 | 417 | MLF_LR   | -13.4644 | 48.5517 |
| CASENT0107059-D01 JDWAM429-05 Crematogaster m2 | Crematogaster | MOTU-1 | Crematogaster | MOTU-1 | 605 | LF_LR    | -13.4644 | 48.5517 |
| CASENT0053827-D01 JDWAM339-05 Crematogaster m3 | Crematogaster | MOTU-3 | Crematogaster | MOTU-3 | 657 | LF_LR    | -13.2117 | 49.5567 |
| CASENT0053682-D01 JDWAM248-05 Eutetramorium m1 | Eutetramorium | MOTU-1 | Eutetramorium | MOTU-1 | 615 | Internal | -14.4367 | 49.775  |
| CASENT0053766-D01 JDWAM289-05 Eutetramorium m1 | Eutetramorium | MOTU-2 | Eutetramorium | MOTU-2 | 296 | MLF_LR   | -13.2633 | 49.6033 |
| CASENT0053891-D01 JDWAM382-05 Eutetramorium m1 | Eutetramorium | MOTU-2 | Eutetramorium | MOTU-2 | 319 | MLF_LR   | -13.2633 | 49.6033 |
| CASENT0053773-D01 JDWAM295-05 Hypoponera m1    | Hypoponera    | MOTU-2 | Hypoponera    | MOTU-2 | 657 | LF_LR    | -14.4367 | 49.775  |
| CASENT0053777-D01 JDWAM299-05 Hypoponera m1    | Hypoponera    | MOTU-1 | Hypoponera    | MOTU-1 | 656 | LF_LR    | -14.4367 | 49.775  |
| CASENT0053780-D01 JDWAM301-05 Hypoponera m1    | Hypoponera    | MOTU-1 | Hypoponera    | MOTU-1 | 657 | LF_LR    | -14.4367 | 49.775  |
| CASENT0053697-D01 JDWAM259-05 Hypoponera m2    | Hypoponera    | MOTU-4 | Hypoponera    | MOTU-4 | 656 | LF_LR    | -13.2117 | 49.5567 |
| CASENT0053724-D01 JDWAM275-05 Hypoponera m2    | Hypoponera    | MOTU-4 | Hypoponera    | MOTU-4 | 657 | LF_LR    | -13.2633 | 49.6033 |
| CASENT0053859-D01 JDWAM359-05 Hypoponera m2    | Hypoponera    | MOTU-4 | Hypoponera    | MOTU-4 | 657 | LF_LR    | -13.2633 | 49.6033 |
| CASENT0107004-D01 JDWAM398-05 Hypoponera m2    | Hypoponera    | MOTU-4 | Hypoponera    | MOTU-4 | 616 | Internal | -13.4644 | 48.5517 |
| CASENT0107706-D02 JDWAM666-05 Hypoponera m2    | Hypoponera    | MOTU-4 | Hypoponera    | MOTU-4 | 623 | Internal | -13.4644 | 48.5517 |
| CASENT0107717-D01 JDWAM676-05 Hypoponera m2    | Hypoponera    | MOTU-4 | Hypoponera    | MOTU-4 | 657 | LF_LR    | -13.4644 | 48.5517 |
| CASENT0053935-D01 JDWAM384-05 Hypoponera m3    | Hypoponera    | MOTU-3 | Leptothorax   | MOTU-2 | 657 | LF_LR    | -13.2117 | 49.5567 |
| CASENT0053756-D01 JDWAM280-05 Hypoponera m4    | Hypoponera    | MOTU-2 | Hypoponera    | MOTU-2 | 644 | LF_LR    | -13.2633 | 49.6033 |
| CASENT0053671-D01 JDWAM244-05 Leptogenys m1    | Leptogenys    | MOTU-5 | Leptogenys    | MOTU-5 | 657 | LF_LR    | -14.4367 | 49.775  |
| CASENT0053717-D01 JDWAM270-05 Leptogenys m1    | Leptogenys    | MOTU-6 | Leptogenys    | MOTU-6 | 657 | LF_LR    | -13.2633 | 49.6033 |
| CASENT0053719-D01 JDWAM271-05 Leptogenys m1    | Leptogenys    | MOTU-6 | Leptogenys    | MOTU-6 | 657 | LF_LR    | -13.2633 | 49.6033 |

|                                              |                    |                    |     |          |          |         |
|----------------------------------------------|--------------------|--------------------|-----|----------|----------|---------|
| CASENT0053804-D01 JDWAM319-05 Leptogenys m1  | Leptogenys MOTU-5  | Leptogenys MOTU-5  | 657 | LF_LR    | -14.4367 | 49.775  |
| CASENT0053857-D01 JDWAM357-05 Leptogenys m1  | Leptogenys MOTU-6  | Leptogenys MOTU-6  | 657 | LF_LR    | -13.2633 | 49.6033 |
| CASENT0053885-D01 JDWAM378-05 Leptogenys m1  | Leptogenys MOTU-6  | Leptogenys MOTU-6  | 657 | LF_LR    | -13.2117 | 49.5567 |
| CASENT0053893-D01 JDWAM772-05 Leptogenys m1  | Leptogenys MOTU-6  | Hypoconera MOTU-3  | 657 | LF_LR    | -13.2633 | 49.6033 |
| CASENT0053712-D01 JDWAM267-05 Leptogenys m2  | Leptogenys MOTU-1  | Leptogenys MOTU-1  | 656 | LF_LR    | -13.2633 | 49.6033 |
| CASENT0053853-D01 JDWAM353-05 Leptogenys m2  | Leptogenys MOTU-3  | Leptogenys MOTU-3  | 657 | LF_LR    | -13.2633 | 49.6033 |
| CASENT0053762-D01 JDWAM285-05 Leptogenys m4  | Leptogenys MOTU-3  | Leptogenys MOTU-3  | 657 | LF_LR    | -13.2633 | 49.6033 |
| CASENT0053790-D01 JDWAM310-05 Leptogenys m4  | Leptogenys MOTU-4  | Leptogenys MOTU-4  | 657 | LF_LR    | -13.2117 | 49.5567 |
| CASENT0053878-D01 JDWAM375-05 Leptogenys m4  | Leptogenys MOTU-4  | Leptogenys MOTU-4  | 657 | LF_LR    | -13.2117 | 49.5567 |
| CASENT0053803-D01 JDWAM318-05 Leptogenys m5  | Leptogenys MOTU-2  | Leptogenys MOTU-2  | 657 | LF_LR    | -13.2633 | 49.6033 |
| CASENT0053856-D01 JDWAM356-05 Leptogenys m5  | Leptogenys MOTU-2  | Leptogenys MOTU-2  | 611 | Internal | -13.2633 | 49.6033 |
| CASENT0107028-D01 JDWAM414-05 Leptothorax m1 | Leptothorax MOTU-3 | Leptothorax MOTU-3 | 622 | Internal | -13.4644 | 48.5517 |
| CASENT0107062-D01 JDWAM433-05 Leptothorax m1 | Leptothorax MOTU-3 | Leptothorax MOTU-3 | 657 | LF_LR    | -13.4644 | 48.5517 |
| CASENT0107062-D02 JDWAM434-05 Leptothorax m1 | Leptothorax MOTU-3 | Leptothorax MOTU-3 | 657 | LF_LR    | -13.4644 | 48.5517 |
| CASENT0107147-D01 JDWAM463-05 Leptothorax m1 | Leptothorax MOTU-3 | Leptothorax MOTU-3 | 657 | LF_LR    | -13.4644 | 48.5517 |
| CASENT0107147-D02 JDWAM464-05 Leptothorax m1 | Leptothorax MOTU-3 | Leptothorax MOTU-3 | 657 | LF_LR    | -13.4644 | 48.5517 |
| CASENT0107716-D01 JDWAM675-05 Leptothorax m1 | Leptothorax MOTU-3 | Leptothorax MOTU-3 | 644 | Internal | -13.4644 | 48.5517 |
| CASENT0107720-D01 JDWAM679-05 Leptothorax m1 | Leptothorax MOTU-3 | Leptothorax MOTU-3 | 614 | Internal | -13.4644 | 48.5517 |
| CASENT0107722-D01 JDWAM680-05 Leptothorax m1 | Leptothorax MOTU-4 | Leptothorax MOTU-4 | 598 | Internal | -13.4644 | 48.5517 |
| CASENT0053945-D01 JDWAM392-05 Leptothorax m2 | Leptothorax MOTU-2 | Leptothorax MOTU-1 | 610 | LF_LR    | -13.2117 | 49.5567 |
| CASENT0107026-D01 JDWAM413-05 Leptothorax m2 | Leptothorax MOTU-1 | Leptothorax MOTU-4 | 644 | LF_LR    | -13.4644 | 48.5517 |
| CASENT0107191-D01 JDWAM470-05 Leptothorax m2 | Leptothorax MOTU-1 | Leptothorax MOTU-1 | 657 | LF_LR    | -13.4644 | 48.5517 |
| CASENT0107191-D02 JDWAM471-05 Leptothorax m2 | Leptothorax MOTU-1 | Leptothorax MOTU-1 | 657 | LF_LR    | -13.4644 | 48.5517 |
| CASENT0107508-D01 JDWAM482-05 Leptothorax m2 | Leptothorax MOTU-2 | Leptothorax MOTU-2 | 657 | LF_LR    | -13.2117 | 49.5567 |
| CASENT0107682-D01 JDWAM646-05 Leptothorax m2 | Leptothorax MOTU-1 | Leptothorax MOTU-1 | 638 | LF_LR    | -13.4644 | 48.5517 |
| CASENT0107682-D02 JDWAM647-05 Leptothorax m2 | Leptothorax MOTU-1 | Leptothorax MOTU-1 | 657 | LF_LR    | -13.4644 | 48.5517 |
| CASENT0107710-D01 JDWAM669-05 Leptothorax m2 | Leptothorax MOTU-1 | Leptothorax MOTU-1 | 657 | LF_LR    | -13.4644 | 48.5517 |
| CASENT0107052-D01 JDWAM426-05 Leptothorax m3 | Leptothorax MOTU-6 | Leptothorax MOTU-6 | 657 | LF_LR    | -13.4644 | 48.5517 |



|                                                |                      |                      |     |          |          |         |
|------------------------------------------------|----------------------|----------------------|-----|----------|----------|---------|
| CASENT0107060-D01 JDWAM430-05 Leptothorax m3   | Leptothorax MOTU-5   | Leptothorax MOTU-5   | 657 | LF_LR    | -13.4644 | 48.5517 |
| CASENT0107060-D02 JDWAM431-05 Leptothorax m3   | Leptothorax MOTU-5   | Leptothorax MOTU-5   | 657 | LF_LR    | -13.4644 | 48.5517 |
| CASENT0107146-D01 JDWAM462-05 Leptothorax m3   | Leptothorax MOTU-6   | Leptothorax MOTU-6   | 657 | LF_LR    | -13.4644 | 48.5517 |
| CASENT0107663-D01 JDWAM633-05 Melissotarsus m1 | Melissotarsus MOTU-1 | Melissotarsus MOTU-1 | 641 | Internal | -13.4644 | 48.5517 |
| CASENT0107665-D01 JDWAM634-05 Melissotarsus m1 | Melissotarsus MOTU-1 | Melissotarsus MOTU-1 | 657 | LF_LR    | -13.4644 | 48.5517 |
| CASENT0053783-D01 JDWAM304-05 Monomorium m1    | Monomorium MOTU-2    | Monomorium MOTU-2    | 658 | LF_LR    | -14.4367 | 49.775  |
| CASENT0107064-D01 JDWAM436-05 Monomorium m1    | Monomorium MOTU-4    | Monomorium MOTU-4    | 657 | LF_LR    | -13.4644 | 48.5517 |
| CASENT0107671-D01 JDWAM639-05 Monomorium m1    | Monomorium MOTU-3    | Monomorium MOTU-3    | 657 | LF_LR    | -13.4644 | 48.5517 |
| CASENT0107689-D01 JDWAM652-05 Monomorium m1    | Monomorium MOTU-3    | Monomorium MOTU-3    | 656 | LF_LR    | -13.4644 | 48.5517 |
| CASENT0107081-D01 JDWAM441-05 Monomorium m2    | Monomorium MOTU-1    | Monomorium MOTU-1    | 546 | LF_LR    | -13.4644 | 48.5517 |
| CASENT0053720-D01 JDWAM272-05 Mystrium m1      | Mystrium MOTU-2      | Mystrium MOTU-2      | 657 | LF_LR    | -13.2633 | 49.6033 |
| CASENT0053888-D01 JDWAM379-05 Mystrium m1      | Mystrium MOTU-1      | Mystrium MOTU-1      | 657 | LF_LR    | -13.2633 | 49.6033 |
| CASENT0053772-D01 JDWAM294-05 Odontomachus m1  | Odontomachus MOTU-1  | Odontomachus MOTU-1  | 657 | Internal | -14.4367 | 49.775  |
| CASENT0053704-D01 JDWAM260-05 Pachycondyla m1  | Pachycondyla MOTU-4  | Pachycondyla MOTU-4  | 405 | MLF_LR   | -13.2633 | 49.6033 |
| CASENT0053714-D01 JDWAM269-05 Pachycondyla m1  | Pachycondyla MOTU-4  | Pachycondyla MOTU-4  | 415 | MLF_LR   | -13.2633 | 49.6033 |
| CASENT0053877-D01 JDWAM374-05 Pachycondyla m1  | Pachycondyla MOTU-5  | Pachycondyla MOTU-5  | 417 | MLF_LR   | -13.2117 | 49.5567 |
| CASENT0107032-D01 JDWAM417-05 Pachycondyla m1  | Pachycondyla MOTU-6  | Pachycondyla MOTU-6  | 657 | LF_LR    | -13.4644 | 48.5517 |
| CASENT0107700-D01 JDWAM660-05 Pachycondyla m1  | Pachycondyla MOTU-6  | Pachycondyla MOTU-6  | 614 | LF_LR    | -13.4644 | 48.5517 |
| CASENT0053774-D01 JDWAM296-05 Pachycondyla m2  | Pachycondyla MOTU-7  | Pachycondyla MOTU-7  | 621 | Internal | -14.4367 | 49.775  |
| CASENT0107042-D01 JDWAM421-05 Pachycondyla m3  | Pachycondyla MOTU-1  | Pachycondyla MOTU-1  | 625 | Internal | -13.4644 | 48.5517 |
| CASENT0053672-D01 JDWAM245-05 Pachycondyla m4  | Pachycondyla MOTU-3  | Pachycondyla MOTU-3  | 619 | LF_LR    | -14.4367 | 49.775  |
| CASENT0107015-D01 JDWAM406-05 Pachycondyla m4  | Pachycondyla MOTU-7  | Pachycondyla MOTU-7  | 657 | LF_LR    | -13.4644 | 48.5517 |
| CASENT0107018-D01 JDWAM408-05 Pachycondyla m4  | Pachycondyla MOTU-7  | Pachycondyla MOTU-7  | 656 | LF_LR    | -13.4644 | 48.5517 |
| CASENT0107695-D01 JDWAM655-05 Pachycondyla m4  | Pachycondyla MOTU-7  | Pachycondyla MOTU-7  | 657 | LF_LR    | -13.4644 | 48.5517 |
| CASENT0107702-D01 JDWAM662-05 Pachycondyla m4  | Pachycondyla MOTU-7  | Pachycondyla MOTU-7  | 657 | LF_LR    | -13.4644 | 48.5517 |
| CASENT0107708-D01 JDWAM668-05 Pachycondyla m4  | Pachycondyla MOTU-7  | Pachycondyla MOTU-7  | 657 | LF_LR    | -13.4644 | 48.5517 |
| CASENT0053805-D01 JDWAM320-05 Pachycondyla m5  | Pachycondyla MOTU-2  | Pachycondyla MOTU-2  | 656 | LF_LR    | -14.4367 | 49.775  |
| CASENT0107002-D01 JDWAM396-05 Paratrechina m1  | Paratrechina MOTU-1  | Paratrechina MOTU-1  | 657 | LF_LR    | -13.4644 | 48.5517 |

|                                               |                     |                     |     |          |          |         |
|-----------------------------------------------|---------------------|---------------------|-----|----------|----------|---------|
| CASENT0107591-D01 JDWAM538-05 Paratrechina m1 | Paratrechina MOTU-1 | Paratrechina MOTU-1 | 427 | MLF_LR   | -13.4644 | 48.5517 |
| CASENT0053939-D01 JDWAM386-05 Paratrechina m2 | Paratrechina MOTU-2 | Paratrechina MOTU-2 | 657 | LF_LR    | -13.2117 | 49.5567 |
| CASENT0107149-D01 JDWAM465-05 Paratrechina m2 | Paratrechina MOTU-2 | Paratrechina MOTU-2 | 657 | LF_LR    | -13.4644 | 48.5517 |
| CASENT0107718-D01 JDWAM677-05 Paratrechina m2 | Paratrechina MOTU-2 | Paratrechina MOTU-2 | 657 | LF_LR    | -13.4644 | 48.5517 |
| CASENT0107733-D01 JDWAM687-05 Paratrechina m2 | Paratrechina MOTU-2 | Paratrechina MOTU-2 | 657 | LF_LR    | -13.4644 | 48.5517 |
| CASENT0107016-D01 JDWAM407-05 Pheidole m1     | Pheidole MOTU-3     | Pheidole MOTU-3     | 655 | LF_LR    | -13.4644 | 48.5517 |
| CASENT0107084-D01 JDWAM444-05 Pheidole m1     | Pheidole MOTU-3     | Pheidole MOTU-3     | 656 | LF_LR    | -13.4644 | 48.5517 |
| CASENT0107091-D01 JDWAM448-05 Pheidole m1     | Pheidole MOTU-3     | Pheidole MOTU-3     | 657 | LF_LR    | -13.4644 | 48.5517 |
| CASENT0107190-D01 JDWAM469-05 Pheidole m1     | Pheidole MOTU-3     | Pheidole MOTU-3     | 657 | LF_LR    | -13.4644 | 48.5517 |
| CASENT0107679-D01 JDWAM644-05 Pheidole m1     | Pheidole MOTU-2     | Pheidole MOTU-2     | 656 | LF_LR    | -13.4644 | 48.5517 |
| CASENT0107681-D01 JDWAM645-05 Pheidole m1     | Pheidole MOTU-1     | Pheidole MOTU-1     | 549 | LF_LR    | -13.4644 | 48.5517 |
| CASENT0107711-D01 JDWAM670-05 Pheidole m1     | Pheidole MOTU-3     | Pheidole MOTU-3     | 656 | LF_LR    | -13.4644 | 48.5517 |
| CASENT0053767-D01 JDWAM290-05 Pheidole m10    | Pheidole MOTU-7     | Pheidole MOTU-7     | 657 | LF_LR    | -13.2633 | 49.6033 |
| CASENT0107715-D01 JDWAM674-05 Pheidole m2     | Pheidole MOTU-11    | Pheidole MOTU-11    | 657 | LF_LR    | -13.4644 | 48.5517 |
| CASENT0107719-D01 JDWAM678-05 Pheidole m2     | Pheidole MOTU-12    | Pheidole MOTU-12    | 657 | LF_LR    | -13.4644 | 48.5517 |
| CASENT0107726-D01 JDWAM683-05 Pheidole m2     | Pheidole MOTU-12    | Pheidole MOTU-12    | 409 | MLF_LR   | -13.4644 | 48.5517 |
| CASENT0107057-D01 JDWAM428-05 Pheidole m3     | Pheidole MOTU-5     | Pheidole MOTU-5     | 657 | LF_LR    | -13.4644 | 48.5517 |
| CASENT0107506-D01 JDWAM480-05 Pheidole m3     | Pheidole MOTU-5     | Pheidole MOTU-5     | 657 | LF_LR    | -13.2117 | 49.5567 |
| CASENT0053775-D01 JDWAM297-05 Pheidole m4     | Pheidole MOTU-10    | Pheidole MOTU-10    | 657 | LF_LR    | -14.4367 | 49.775  |
| CASENT0053872-D01 JDWAM372-05 Pheidole m5     | Pheidole MOTU-4     | Pheidole MOTU-9     | 599 | LF_LR    | -14.4367 | 49.775  |
| CASENT0053689-D01 JDWAM254-05 Pheidole m8     | Pheidole MOTU-9     | Pheidole MOTU-9     | 657 | Internal | -13.2117 | 49.5567 |
| CASENT0053842-D01 JDWAM346-05 Pheidole m8     | Pheidole MOTU-8     | Pheidole MOTU-8     | 634 | LF_LR    | -13.2633 | 49.6033 |
| CASENT0053936-D01 JDWAM385-05 Pheidole m8     | Pheidole MOTU-9     | Pheidole MOTU-9     | 657 | LF_LR    | -13.2117 | 49.5567 |
| CASENT0053941-D01 JDWAM388-05 Pheidole m8     | Pheidole MOTU-9     | Pheidole MOTU-9     | 657 | LF_LR    | -13.2117 | 49.5567 |
| CASENT0053942-D01 JDWAM389-05 Pheidole m8     | Pheidole MOTU-9     | Pheidole MOTU-4     | 657 | LF_LR    | -13.2117 | 49.5567 |
| CASENT0053688-D01 JDWAM253-05 Pheidole m9     | Pheidole MOTU-6     | Pheidole MOTU-6     | 657 | LF_LR    | -13.2117 | 49.5567 |
| CASENT0107001-D01 JDWAM395-05 Plagiolepis m1  | Plagiolepis MOTU-4  | Plagiolepis MOTU-4  | 581 | Internal | -13.4644 | 48.5517 |
| CASENT0107069-D01 JDWAM437-05 Plagiolepis m1  | Plagiolepis MOTU-1  | Plagiolepis MOTU-1  | 657 | LF_LR    | -13.4644 | 48.5517 |

|                                               |                     |                     |     |          |          |         |
|-----------------------------------------------|---------------------|---------------------|-----|----------|----------|---------|
| CASENT0107070-D01 JDWAM438-05 Plagiolepis m1  | Plagiolepis MOTU-3  | Plagiolepis MOTU-3  | 657 | LF_LR    | -13.4644 | 48.5517 |
| CASENT0107151-D01 JDWAM467-05 Plagiolepis m1  | Plagiolepis MOTU-3  | Plagiolepis MOTU-3  | 657 | LF_LR    | -13.4644 | 48.5517 |
| CASENT0107235-D01 JDWAM474-05 Plagiolepis m1  | Plagiolepis MOTU-3  | Plagiolepis MOTU-3  | 657 | LF_LR    | -13.4644 | 48.5517 |
| CASENT0107594-D01 JDWAM541-05 Plagiolepis m1  | Plagiolepis MOTU-3  | Plagiolepis MOTU-3  | 657 | LF_LR    | -13.4644 | 48.5517 |
| CASENT0107071-D01 JDWAM439-05 Plagiolepis m2  | Plagiolepis MOTU-4  | Plagiolepis MOTU-5  | 546 | Internal | -13.4644 | 48.5517 |
| CASENT0107061-D01 JDWAM432-05 Plagiolepis m3  | Plagiolepis MOTU-2  | Plagiolepis MOTU-2  | 657 | LF_LR    | -13.4644 | 48.5517 |
| CASENT0053844-D01 JDWAM348-05 Platythyrea m1  | Platythyrea MOTU-1  | Platythyrea MOTU-1  | 657 | LF_LR    | -13.2633 | 49.6033 |
| CASENT0053854-D01 JDWAM354-05 Platythyrea m1  | Platythyrea MOTU-1  | Platythyrea MOTU-1  | 614 | LF_LR    | -13.2633 | 49.6033 |
| CASENT0107005-D01 JDWAM399-05 Platythyrea m1  | Platythyrea MOTU-2  | Platythyrea MOTU-2  | 657 | LF_LR    | -13.4644 | 48.5517 |
| CASENT0107035-D01 JDWAM418-05 Platythyrea m1  | Platythyrea MOTU-2  | Platythyrea MOTU-2  | 657 | LF_LR    | -13.4644 | 48.5517 |
| CASENT0107593-D01 JDWAM540-05 Platythyrea m1  | Platythyrea MOTU-2  | Platythyrea MOTU-2  | 657 | LF_LR    | -13.4644 | 48.5517 |
| CASENT0107704-D01 JDWAM664-05 Platythyrea m1  | Platythyrea MOTU-2  | Platythyrea MOTU-2  | 657 | LF_LR    | -13.4644 | 48.5517 |
| CASENT0107701-D01 JDWAM661-05 Platythyrea m2  | Platythyrea MOTU-3  | Platythyrea MOTU-3  | 657 | LF_LR    | -13.4644 | 48.5517 |
| CASENT0053874-D01 JDWAM373-05 Prionopelta m1  | Prionopelta MOTU-1  | Prionopelta MOTU-1  | 657 | LF_LR    | -14.4367 | 49.775  |
| CASENT0053722-D01 JDWAM273-05 Pyramica m1     | Pyramica MOTU-1     | Pyramica MOTU-1     | 657 | LF_LR    | -13.2633 | 49.6033 |
| CASENT0107029-D01 JDWAM415-05 Simopone m1     | Simopone MOTU-1     | Simopone MOTU-1     | 657 | LF_LR    | -13.4644 | 48.5517 |
| CASENT0053770-D01 JDWAM292-05 Strumigenys m1  | Strumigenys MOTU-4  | Strumigenys MOTU-4  | 657 | LF_LR    | -13.2633 | 49.6033 |
| CASENT0053771-D01 JDWAM293-05 Strumigenys m1  | Strumigenys MOTU-4  | Strumigenys MOTU-4  | 657 | LF_LR    | -13.2633 | 49.6033 |
| CASENT0053782-D01 JDWAM303-05 Strumigenys m1  | Strumigenys MOTU-4  | Strumigenys MOTU-3  | 657 | LF_LR    | -14.4367 | 49.775  |
| CASENT0053781-D01 JDWAM302-05 Strumigenys m2  | Strumigenys MOTU-2  | Strumigenys MOTU-2  | 657 | LF_LR    | -14.4367 | 49.775  |
| CASENT0053779-D01 JDWAM300-05 Strumigenys m3  | Strumigenys MOTU-1  | Strumigenys MOTU-1  | 657 | LF_LR    | -14.4367 | 49.775  |
| CASENT0107714-D01 JDWAM673-05 Tapinoma m1     | Tapinoma MOTU-1     | Tapinoma MOTU-1     | 657 | LF_LR    | -13.4644 | 48.5517 |
| CASENT0053815-D01 JDWAM329-05 Technomyrmex m1 | Technomyrmex MOTU-2 | Technomyrmex MOTU-2 | 639 | LF_LR    | -13.2117 | 49.5567 |
| CASENT0107730-D01 JDWAM685-05 Technomyrmex m1 | Technomyrmex MOTU-2 | Technomyrmex MOTU-2 | 611 | LF_LR    | -13.4644 | 48.5517 |
| CASENT0107231-D01 JDWAM472-05 Technomyrmex m2 | Technomyrmex MOTU-1 | Technomyrmex MOTU-1 | 657 | LF_LR    | -13.4644 | 48.5517 |
| CASENT0053708-D01 JDWAM263-05 Terataner m1    | Terataner MOTU-1    | Terataner MOTU-1    | 611 | LF_LR    | -13.2633 | 49.6033 |
| CASENT0053709-D01 JDWAM264-05 Terataner m1    | Terataner MOTU-1    | Terataner MOTU-1    | 562 | LF_LR    | -13.2633 | 49.6033 |
| CASENT0053686-D01 JDWAM251-05 Terataner m2    | Terataner MOTU-2    | Terataner MOTU-2    | 656 | LF_LR    | -13.2117 | 49.5567 |

|                                                |                     |                     |     |          |          |         |
|------------------------------------------------|---------------------|---------------------|-----|----------|----------|---------|
| CASENT0053820-D01 JDWAM332-05 Terataner m2     | Terataner MOTU-2    | Terataner MOTU-2    | 657 | LF_LR    | -13.2117 | 49.5567 |
| CASENT0107009-D01 JDWAM402-05 Terataner m2     | Terataner MOTU-4    | Terataner MOTU-3    | 657 | LF_LR    | -13.4644 | 48.5517 |
| CASENT0107585-D01 JDWAM534-05 Terataner m2     | Terataner MOTU-4    | Terataner MOTU-3    | 644 | LF_LR    | -13.4644 | 48.5517 |
| CASENT0107589-D01 JDWAM536-05 Terataner m2     | Terataner MOTU-4    | Terataner MOTU-4    | 656 | LF_LR    | -13.4644 | 48.5517 |
| CASENT0107670-D01 JDWAM638-05 Terataner m2     | Terataner MOTU-4    | Terataner MOTU-4    | 657 | LF_LR    | -13.4644 | 48.5517 |
| CASENT0107675-D01 JDWAM643-05 Terataner m2     | Terataner MOTU-4    | Terataner MOTU-4    | 657 | LF_LR    | -13.4644 | 48.5517 |
| CASENT0107692-D01 JDWAM653-05 Terataner m2     | Terataner MOTU-4    | Terataner MOTU-3    | 657 | LF_LR    | -13.4644 | 48.5517 |
| CASENT0107693-D01 JDWAM654-05 Terataner m2     | Terataner MOTU-4    | Terataner MOTU-3    | 657 | LF_LR    | -13.4644 | 48.5517 |
| CASENT0107698-D01 JDWAM658-05 Terataner m2     | Terataner MOTU-4    | Terataner MOTU-4    | 657 | LF_LR    | -13.4644 | 48.5517 |
| CASENT0053943-D01 JDWAM390-05 Tetramorium m1   | Tetramorium MOTU-11 | Tetramorium MOTU-11 | 657 | LF_LR    | -13.2117 | 49.5567 |
| CASENT0053946-D01 JDWAM393-05 Tetramorium m1   | Tetramorium MOTU-11 | Tetramorium MOTU-11 | 657 | LF_LR    | -13.2117 | 49.5567 |
| CASENT0107003-D01 JDWAM397-05 Tetramorium m1   | Tetramorium MOTU-12 | Tetramorium MOTU-12 | 657 | LF_LR    | -13.4644 | 48.5517 |
| CASENT0107713-D01 JDWAM672-05 Tetramorium m1   | Tetramorium MOTU-13 | Tetramorium MOTU-13 | 615 | Internal | -13.4644 | 48.5517 |
| CASENT0053723-D01 JDWAM274-05 Tetramorium m1 1 | Tetramorium MOTU-8  | Tetramorium MOTU-8  | 644 | LF_LR    | -13.2633 | 49.6033 |
| CASENT0053769-D01 JDWAM291-05 Tetramorium m1 1 | Tetramorium MOTU-6  | Tetramorium MOTU-6  | 657 | LF_LR    | -13.2633 | 49.6033 |
| CASENT0053685-D01 JDWAM250-05 Tetramorium m2   | Tetramorium MOTU-9  | Tetramorium MOTU-9  | 657 | LF_LR    | -13.2117 | 49.5567 |
| CASENT0053687-D01 JDWAM252-05 Tetramorium m2   | Tetramorium MOTU-9  | Tetramorium MOTU-9  | 644 | LF_LR    | -13.2117 | 49.5567 |
| CASENT0053691-D01 JDWAM255-05 Tetramorium m2   | Tetramorium MOTU-9  | Tetramorium MOTU-9  | 658 | Internal | -13.2117 | 49.5567 |
| CASENT0053813-D01 JDWAM327-05 Tetramorium m2   | Tetramorium MOTU-9  | Tetramorium MOTU-9  | 656 | LF_LR    | -13.2117 | 49.5567 |
| CASENT0053822-D01 JDWAM334-05 Tetramorium m2   | Tetramorium MOTU-9  | Tetramorium MOTU-9  | 657 | LF_LR    | -13.2117 | 49.5567 |
| CASENT0053828-D01 JDWAM340-05 Tetramorium m2   | Tetramorium MOTU-9  | Tetramorium MOTU-9  | 657 | LF_LR    | -13.2117 | 49.5567 |
| CASENT0053940-D01 JDWAM387-05 Tetramorium m2   | Tetramorium MOTU-9  | Tetramorium MOTU-9  | 657 | LF_LR    | -13.2117 | 49.5567 |
| CASENT0053808-D01 JDWAM323-05 Tetramorium m4   | Tetramorium MOTU-1  | Tetramorium MOTU-1  | 657 | LF_LR    | -14.4367 | 49.775  |
| CASENT0053757-D01 JDWAM281-05 Tetramorium m5   | Tetramorium MOTU-2  | Tetramorium MOTU-3  | 616 | Internal | -13.2633 | 49.6033 |
| CASENT0053802-D01 JDWAM317-05 Tetramorium m5   | Tetramorium MOTU-2  | Tetramorium MOTU-4  | 657 | LF_LR    | -13.2633 | 49.6033 |
| CASENT0053806-D01 JDWAM321-05 Tetramorium m5   | Tetramorium MOTU-2  | Tetramorium MOTU-2  | 657 | LF_LR    | -14.4367 | 49.775  |
| CASENT0053858-D01 JDWAM358-05 Tetramorium m5   | Tetramorium MOTU-2  | Tetramorium MOTU-4  | 657 | LF_LR    | -13.2633 | 49.6033 |
| CASENT0053860-D01 JDWAM360-05 Tetramorium m5   | Tetramorium MOTU-2  | Tetramorium MOTU-3  | 657 | LF_LR    | -13.2633 | 49.6033 |

|                                              |                     |                     |     |          |          |         |
|----------------------------------------------|---------------------|---------------------|-----|----------|----------|---------|
| CASENT0053889-D01 JDWAM380-05 Tetramorium m5 | Tetramorium MOTU-2  | Tetramorium MOTU-4  | 605 | LF_LR    | -13.2633 | 49.6033 |
| CASENT0107703-D01 JDWAM663-05 Tetramorium m6 | Tetramorium MOTU-10 | Tetramorium MOTU-10 | 657 | LF_LR    | -13.4644 | 48.5517 |
| CASENT0053894-D01 JDWAM383-05 Tetramorium m8 | Tetramorium MOTU-5  | Tetramorium MOTU-5  | 657 | LF_LR    | -13.2633 | 49.6033 |
| CASENT0053725-D01 JDWAM276-05 Tetramorium m9 | Tetramorium MOTU-7  | Tetramorium MOTU-7  | 657 | LF_LR    | -13.2633 | 49.6033 |
| CASENT0053710-D01 JDWAM265-05 Tetraponera m1 | Tetraponera MOTU-8  | Tetraponera MOTU-8  | 654 | LF_LR    | -13.2633 | 49.6033 |
| CASENT0053791-D01 JDWAM311-05 Tetraponera m1 | Tetraponera MOTU-9  | Tetraponera MOTU-9  | 657 | LF_LR    | -13.2117 | 49.5567 |
| CASENT0053849-D01 JDWAM351-05 Tetraponera m1 | Tetraponera MOTU-10 | Tetraponera MOTU-10 | 657 | LF_LR    | -13.2633 | 49.6033 |
| CASENT0053868-D01 JDWAM367-05 Tetraponera m1 | Tetraponera MOTU-7  | Tetraponera MOTU-8  | 623 | Internal | -14.4367 | 49.775  |
| CASENT0053869-D01 JDWAM368-05 Tetraponera m1 | Tetraponera MOTU-7  | Tetraponera MOTU-9  | 656 | LF_LR    | -14.4367 | 49.775  |
| CASENT0053869-D02 JDWAM369-05 Tetraponera m1 | Tetraponera MOTU-7  | Tetraponera MOTU-7  | 657 | LF_LR    | -14.4367 | 49.775  |
| CASENT0107008-D01 JDWAM401-05 Tetraponera m2 | Tetraponera MOTU-1  | Tetraponera MOTU-1  | 657 | LF_LR    | -13.4644 | 48.5517 |
| CASENT0107087-D01 JDWAM445-05 Tetraponera m3 | Tetraponera MOTU-2  | Tetraponera MOTU-2  | 657 | LF_LR    | -13.4644 | 48.5517 |
| CASENT0107685-D01 JDWAM650-05 Tetraponera m3 | Tetraponera MOTU-2  | Tetraponera MOTU-2  | 626 | LF_LR    | -13.4644 | 48.5517 |
| CASENT0107012-D01 JDWAM404-05 Tetraponera m4 | Tetraponera MOTU-6  | Tetraponera MOTU-6  | 657 | LF_LR    | -13.4644 | 48.5517 |
| CASENT0107043-D01 JDWAM422-05 Tetraponera m4 | Tetraponera MOTU-6  | Tetraponera MOTU-6  | 657 | LF_LR    | -13.4644 | 48.5517 |
| CASENT0107150-D01 JDWAM466-05 Tetraponera m4 | Tetraponera MOTU-6  | Tetraponera MOTU-6  | 657 | LF_LR    | -13.4644 | 48.5517 |
| CASENT0107683-D01 JDWAM648-05 Tetraponera m4 | Tetraponera MOTU-6  | Tetraponera MOTU-6  | 657 | LF_LR    | -13.4644 | 48.5517 |
| CASENT0107712-D01 JDWAM671-05 Tetraponera m4 | Tetraponera MOTU-6  | Tetraponera MOTU-6  | 657 | Internal | -13.4644 | 48.5517 |
| CASENT0107088-D01 JDWAM446-05 Tetraponera m5 | Tetraponera MOTU-5  | Tetraponera MOTU-5  | 657 | LF_LR    | -13.4644 | 48.5517 |
| CASENT0053695-D01 JDWAM257-05 Tetraponera m6 | Tetraponera MOTU-3  | Tetraponera MOTU-3  | 644 | LF_LR    | -13.2117 | 49.5567 |
| CASENT0053826-D01 JDWAM338-05 Tetraponera m6 | Tetraponera MOTU-3  | Tetraponera MOTU-3  | 657 | LF_LR    | -13.2117 | 49.5567 |
| CASENT0053812-D01 JDWAM326-05 Tetraponera m7 | Tetraponera MOTU-4  | Tetraponera MOTU-4  | 617 | LF_LR    | -13.2117 | 49.5567 |
| CASENT0107507-D01 JDWAM481-05 Tetraponera m7 | Tetraponera MOTU-4  | Tetraponera MOTU-4  | 657 | LF_LR    | -13.2117 | 49.5567 |
